# Supplementary material for: Cancer-associated fibroblasts drive colorectal cancer cell progression through exosomal miR-20a-5p-mediated targeting of PTEN and stimulating interleukin-6 production
Source: Springer Nature journal article supplement (doi:10.1186/s12885-024-12190-0), 2024-04-01
Supplement: MOESM1 [file 26928114]

# Supplementary Table 1.

**Supplementary Table 1.** The clinicopathological characteristics of CRC patients

| <b>Characteristics</b> | <b>No. of<br/>CRC patients<br/>(%)</b> | <b>No. of<br/>HC individuals<br/>(%)</b> |
|------------------------|----------------------------------------|------------------------------------------|
| <b>Age (years)</b>     |                                        |                                          |
| <50                    | 17 (38)                                | 17 (43)                                  |
| ≥50                    | 28 (62)                                | 23 (58)                                  |
| <b>Gender</b>          |                                        |                                          |
| Male                   | 35 (78)                                | 30 (75)                                  |
| Female                 | 10 (22)                                | 10 (25)                                  |
| <b>Position</b>        |                                        |                                          |
| Colon                  | 18 (40)                                |                                          |
| Rectal                 | 27 (60)                                |                                          |
| <b>Tumor size</b>      |                                        |                                          |
| <2 cm                  | 16 (36)                                |                                          |
| ≥2 cm                  | 29 (64)                                |                                          |
| <b>LNM</b>             |                                        |                                          |
| Metastasis             | 19 (42)                                |                                          |
| No metastasis          | 26 (58)                                |                                          |
| <b>Tumor stage</b>     |                                        |                                          |
| I+II                   | 27 (60)                                |                                          |
| III                    | 18 (40)                                |                                          |

Abbreviations: CRC, Colorectal cancer; HC, Healthy controls; LNM, Lymph node metastasis

# Supplementary Fig. 1

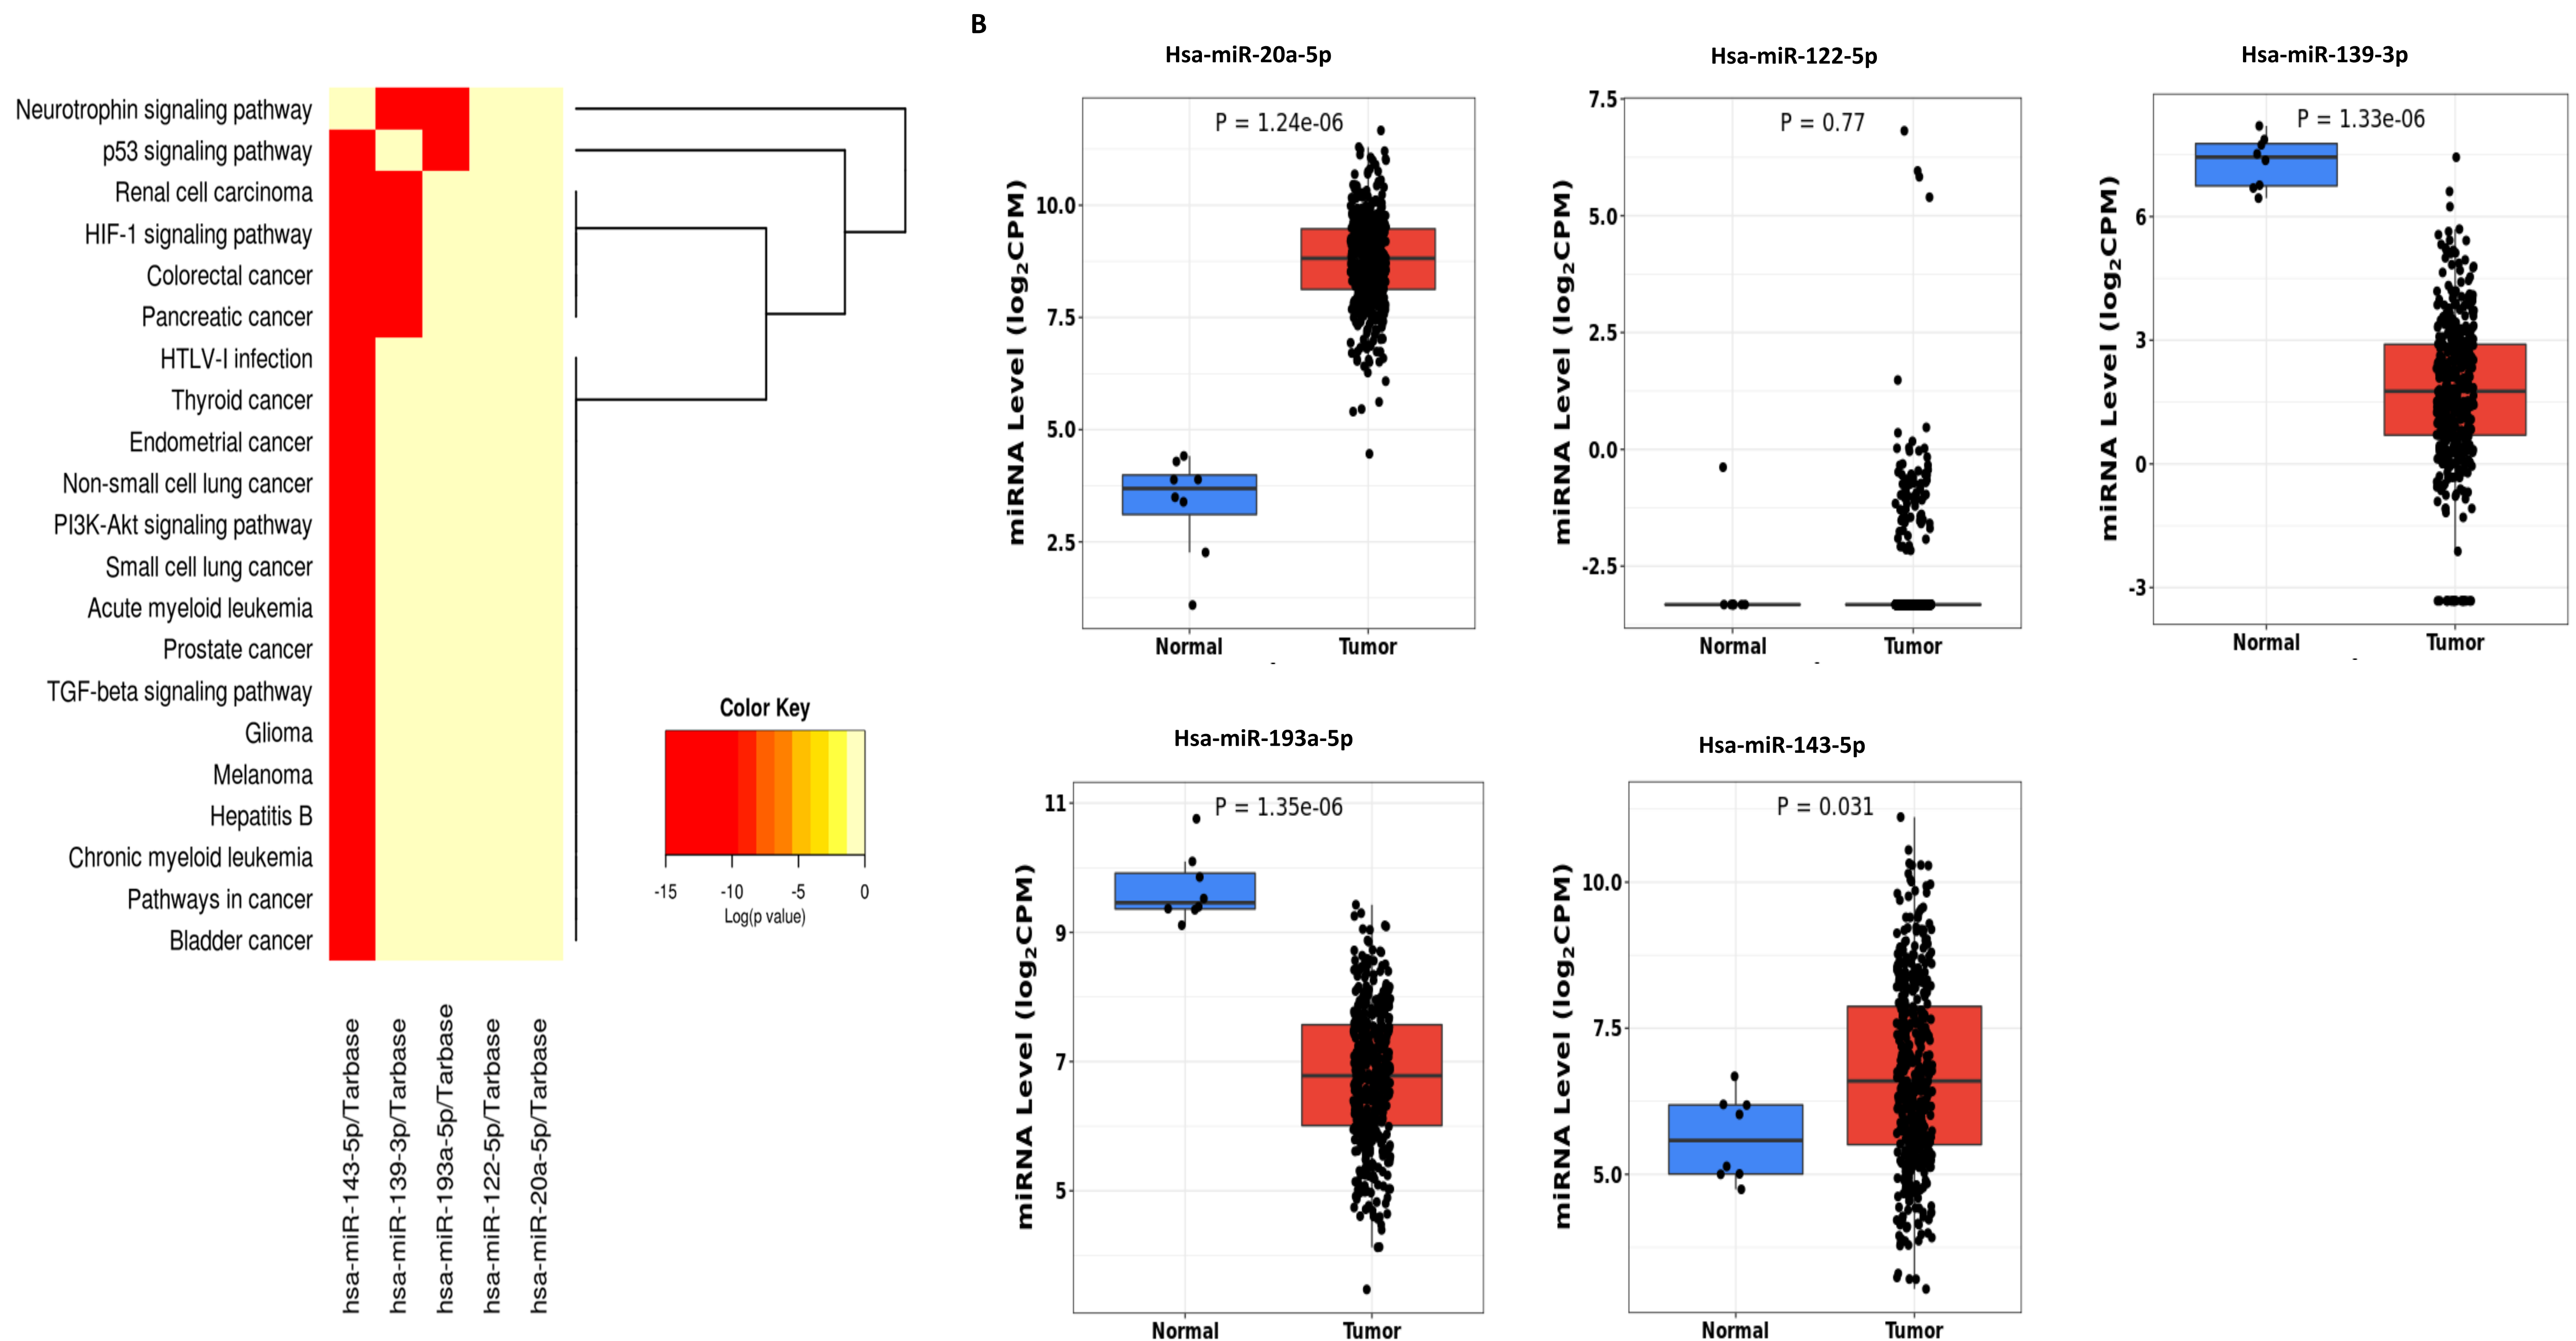

**Supplementary Fig. 1. A. DIANA-miRPATH (TarBase) revealed the most critical pathophysiological features associated with each candidate miRNA. miR-20a-5p exhibited the strongest correlation with most of the proposed features. B. The expression levels of five candidate miRNAs in CRC patients compared to non-tumor samples. The expression of each miRNA was assessed using CancerMIRNome in CRC.**

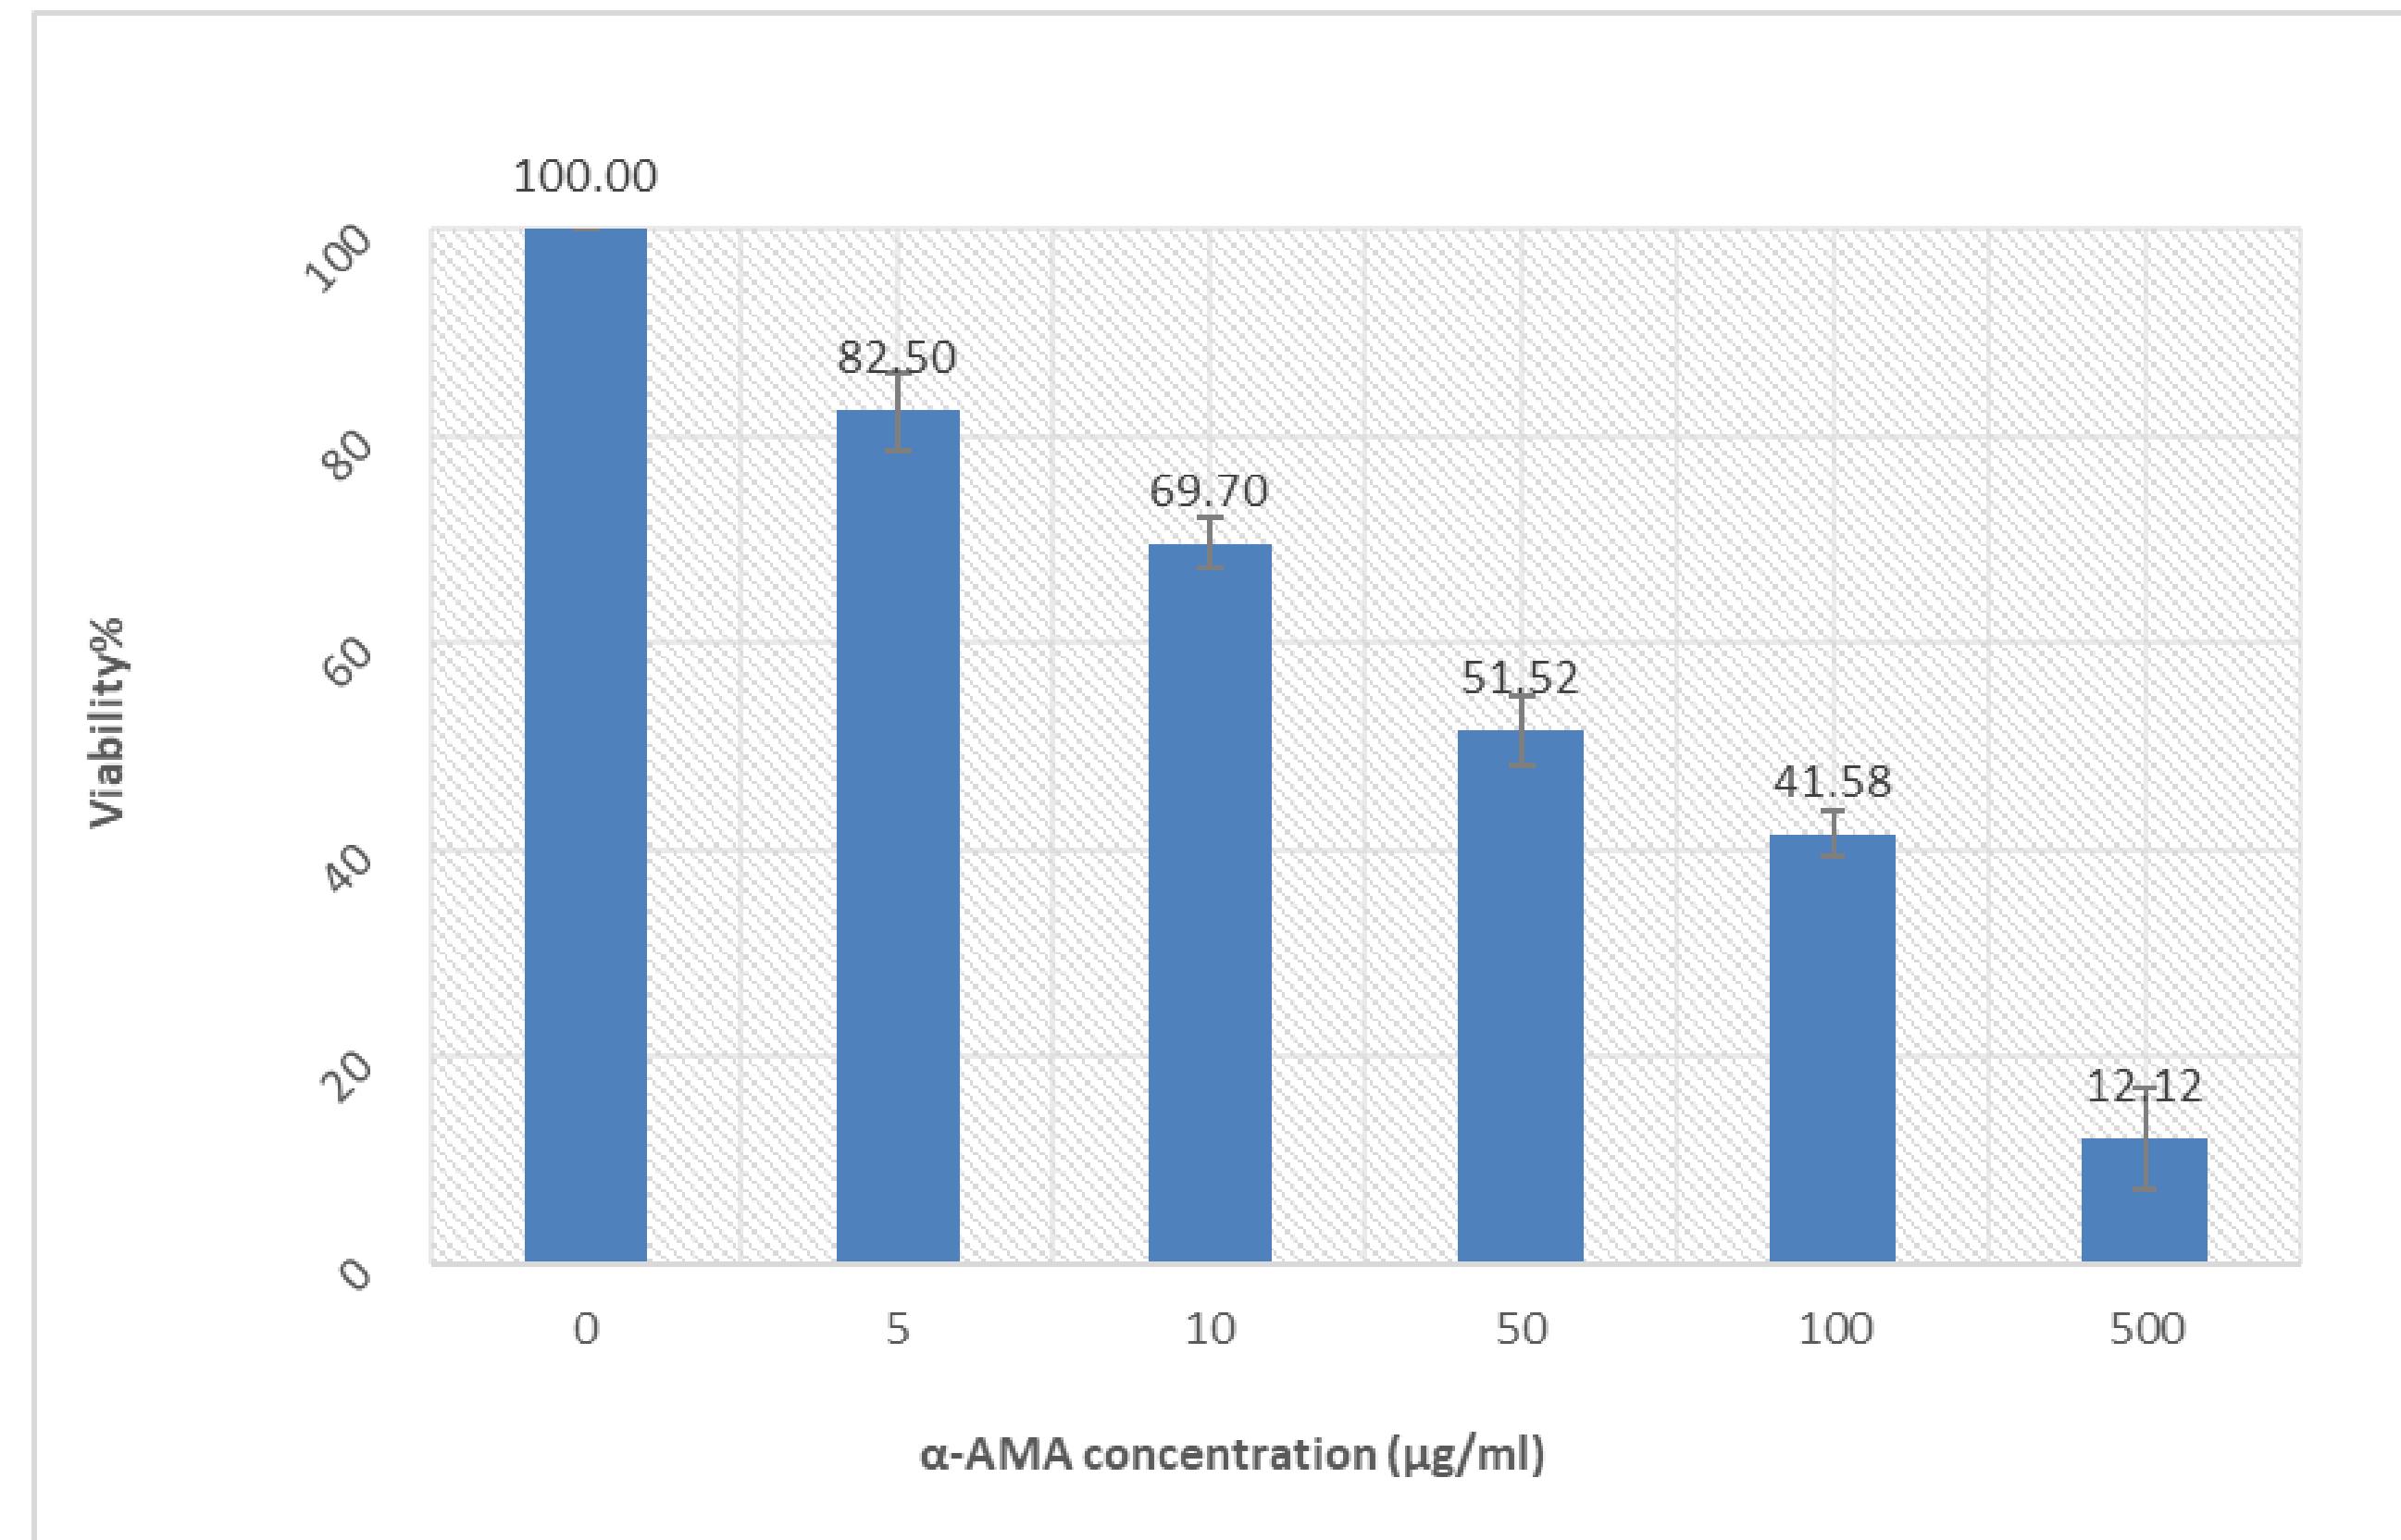

**Supplementary Fig. 2. Effects caused by different concentration of  $\alpha$ -amanitin ( $\alpha$ -AMA) on the viability of SW480 CRC cells.**

Treatment of SW480 cells with increasing concentrations of  $\alpha$ -amanitin (Sigma) for 8 hours demonstrated a dose-dependent reduction in cell survival. These findings were further utilized to determine the IC50 values, which are crucial for subsequent experiments. Notably, at an  $\alpha$ -amanitin concentration of 50  $\mu\text{g/mL}$ , the viability of SW480 cells decreased by approximately 50%. Based on these results, the IC50 value of  $\alpha$ -amanitin for SW480 cells was established at 50  $\mu\text{g/mL}$  and was subsequently employed in subsequent experimental analyses.

# Supplementary Fig. 3

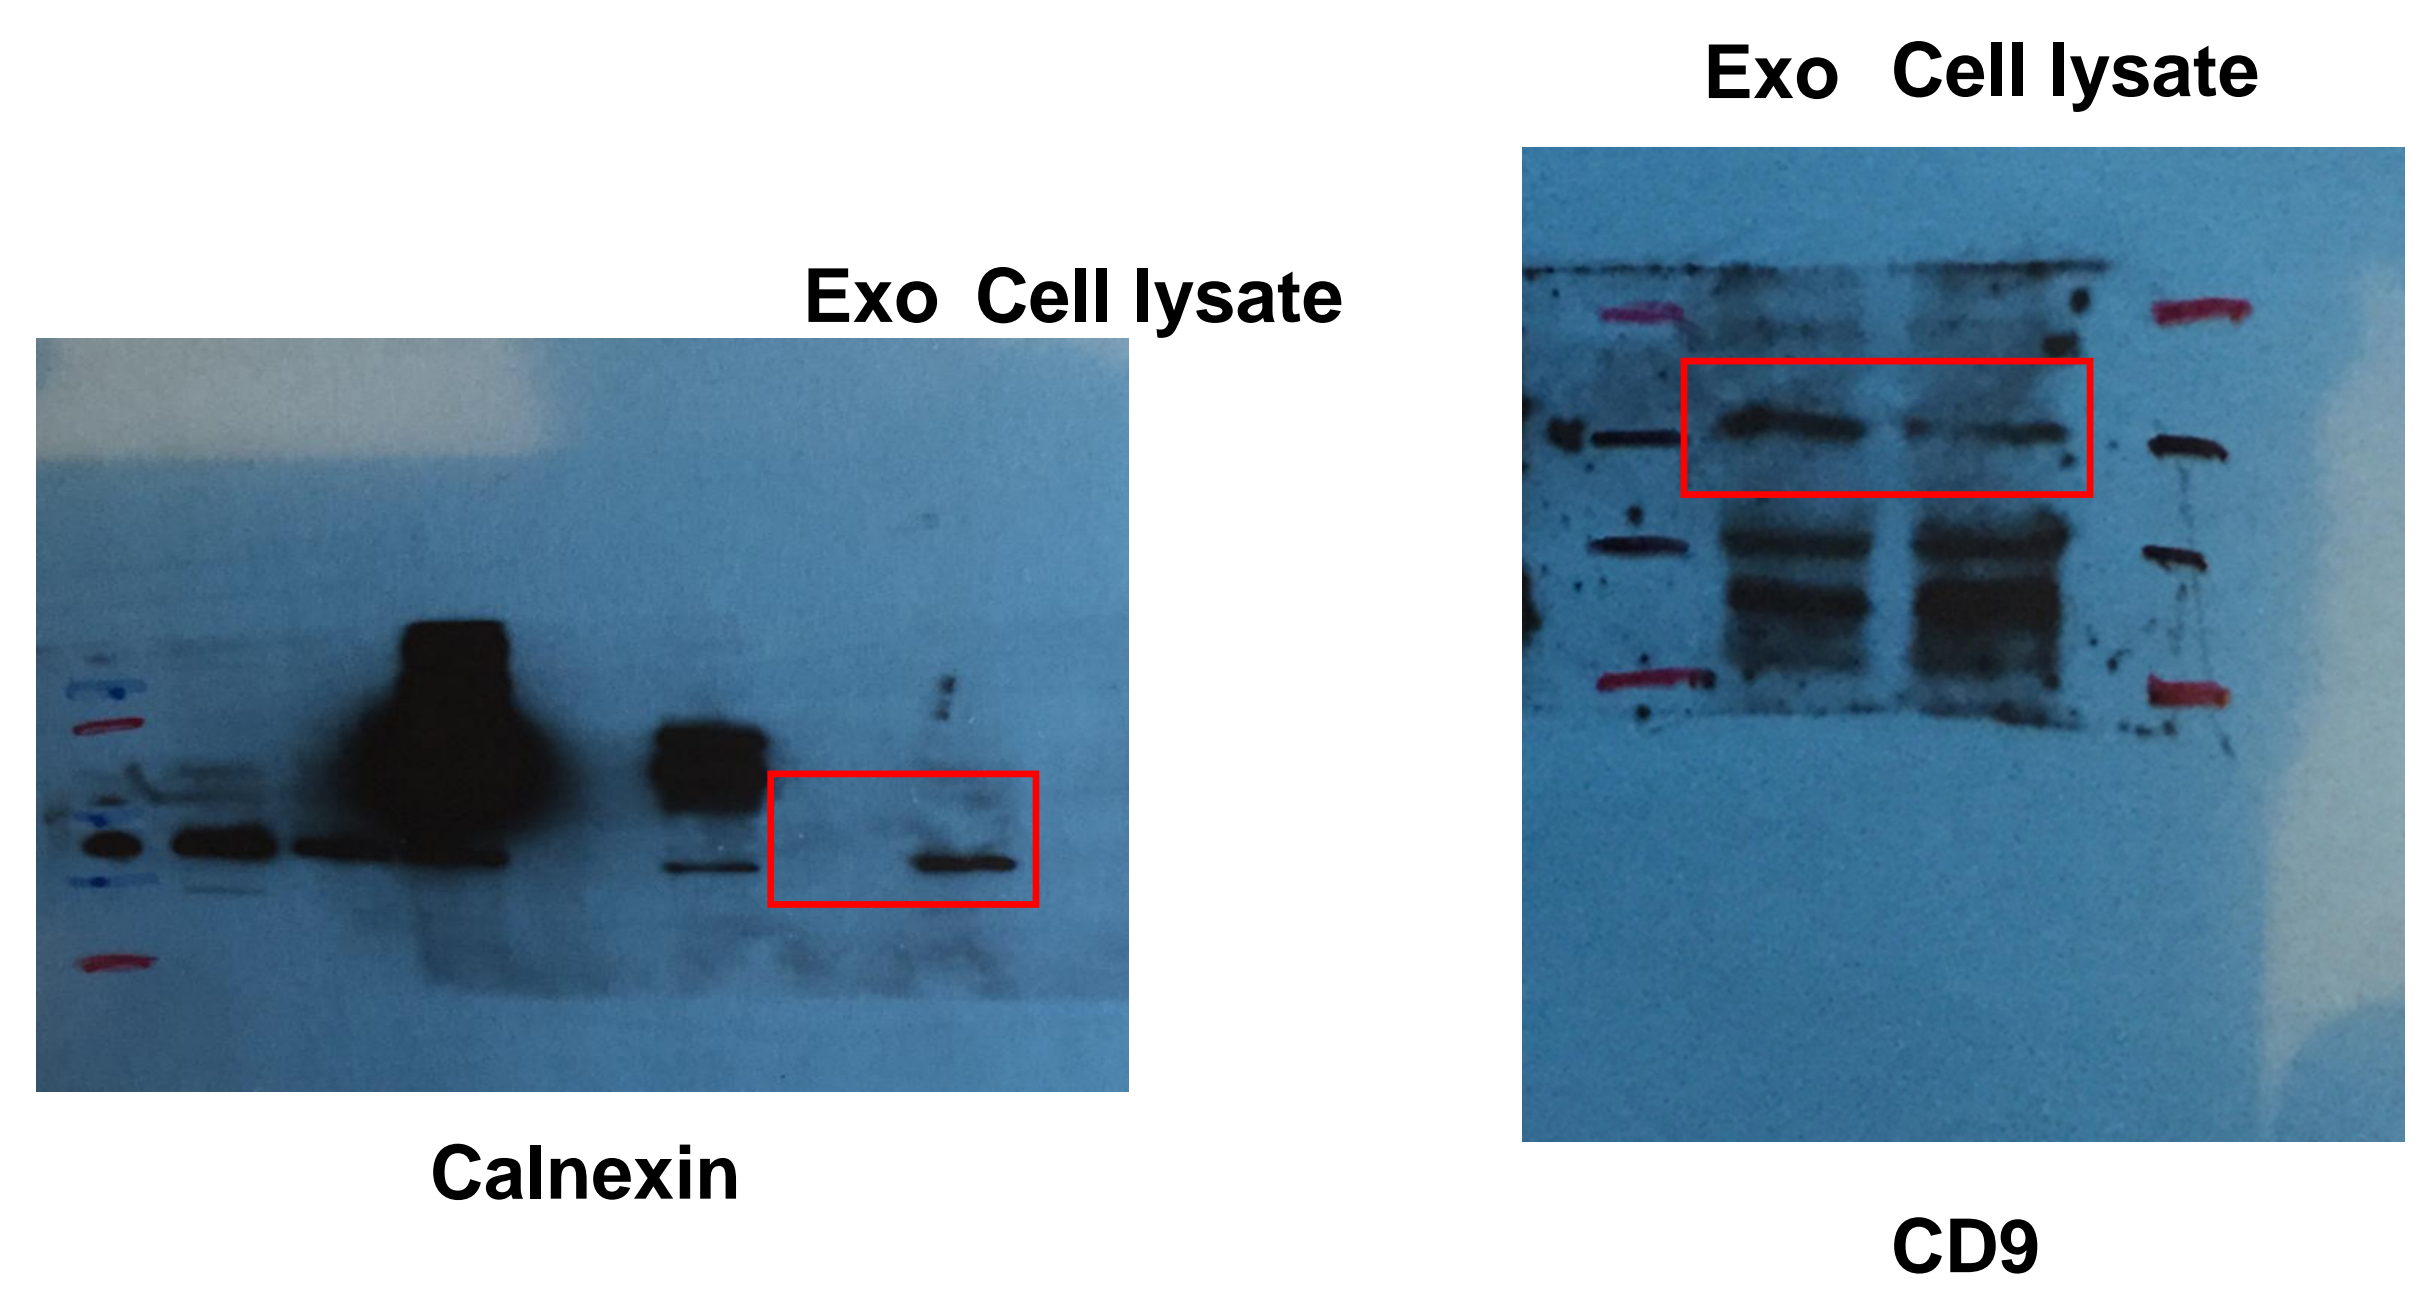

**Supplementary Fig. 3.** Western blots raw data. The full-length blots of Calnexin and CD9. The same membranes were cut and hybridization with different antibodies according to the molecular weights.

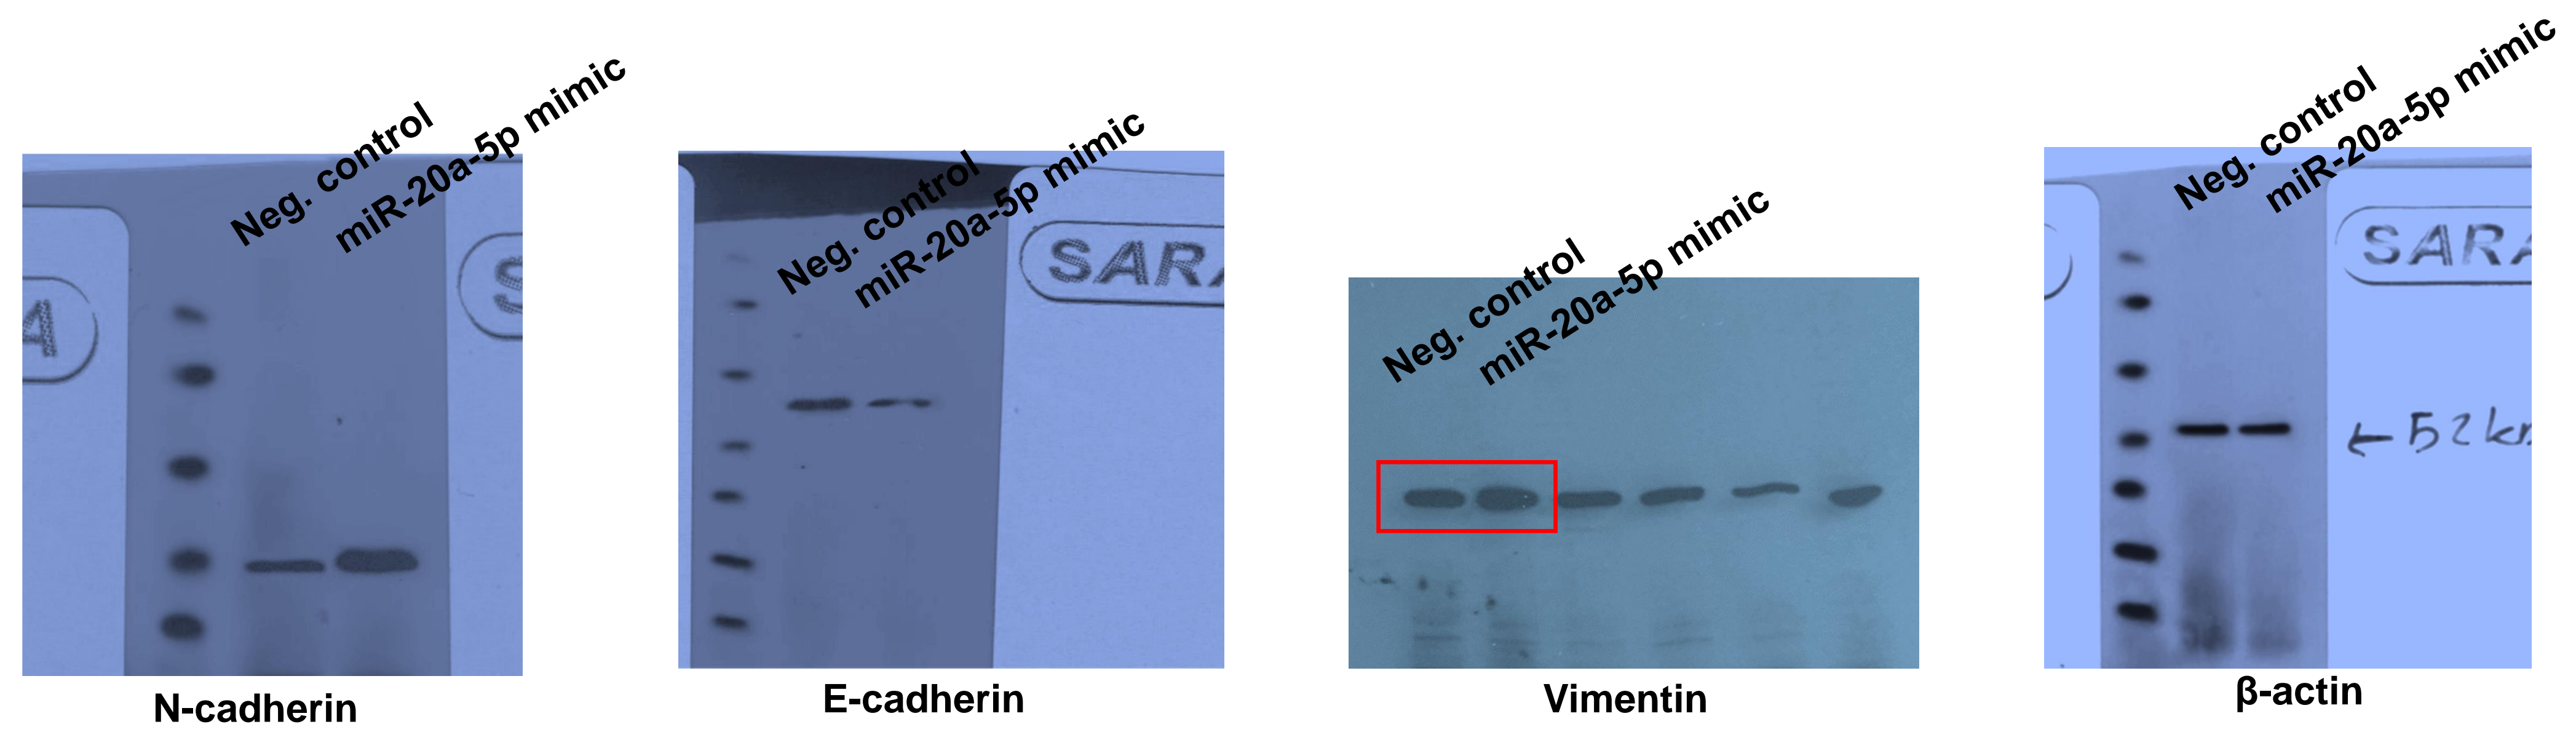

**Supplementary Fig. 4.** Western blots raw data. The full-length blots of N-cadherin, E-cadherin, Vimentin and  $\beta$ -actin.

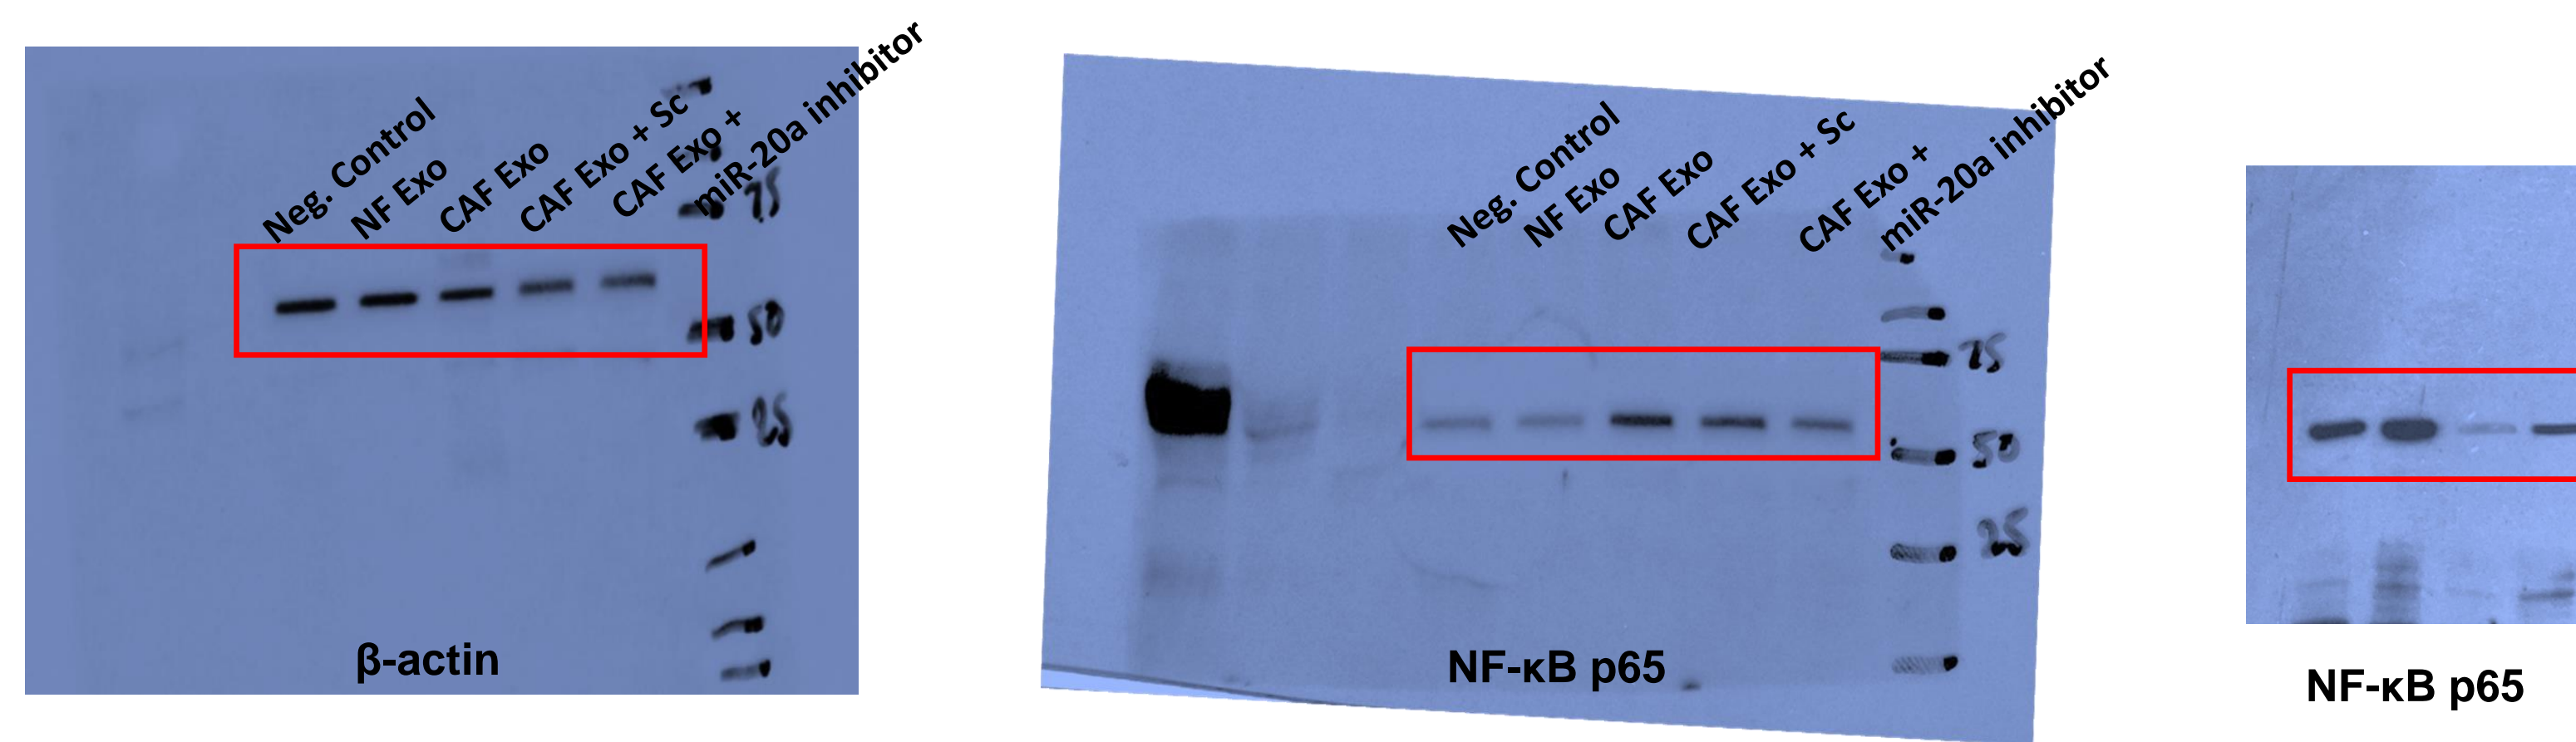

**Supplementary Fig. 5.** Western blots raw data. The full-length blots of NF- $\kappa$ B p65 and  $\beta$ -actin.
